# Supplementary material for: Deriving confidence intervals for mutation rates across a wide range of evolutionary distances using FracMinHash
Source: PubMed Central journal article supplement — Genome Res. 2023 Jul;33(7):1061–8. doi: 10.1101/gr.277651.123 (PMC10538494; doi:10.1101/gr.277651.123), 2023-07
Supplement: supplemental_figures_and_tables_combined.pdf [file supplemental_figures_and_tables_combined.pdf]

|         | L = 10 K |      |      | L = 100 K |      |       | L = 1 M |      |      |
|---------|----------|------|------|-----------|------|-------|---------|------|------|
| p =     | 0.001    | 0.1  | 0.2  | 0.001     | 0.1  | 0.2   | 0.001   | 0.1  | 0.2  |
| k = 21  | 95.4     | 95.3 | 94.7 | 95.0      | 95.2 | 95.06 | 95.0    | 95.0 | 94.6 |
| k = 51  | 95.4     | 94.8 | N/A  | 94.8      | 94.6 | N/A   | 94.9    | 95.1 | 94.4 |
| k = 100 | 94.7     | N/A  | N/A  | 94.6      | N/A  | N/A   | 95.4    | 93.7 | N/A  |

Table S1: The percentage of experiments that resulted in the true mutation rate falling within the 95% confidence interval given in Theorem 8 when using various mutation rates across multiple  $k$ -mer sizes and  $L$  values. A scale factor of 0.2 was used. The results show an average over 10,000 simulations for each setting. N/A entries indicate that the parameters are not particularly meaningful and will not produce interpretable results, either because  $E[N_{\text{mut}}] \approx L$  in these cases (almost all  $k$ -mers are mutated), or because the scale factor is too small to differentiate between the two FracMinHash sketches.

|         | L = 10 K |      |      | L = 100 K |      |      | L = 1 M |      |      |
|---------|----------|------|------|-----------|------|------|---------|------|------|
| p =     | 0.001    | 0.1  | 0.2  | 0.001     | 0.1  | 0.2  | 0.001   | 0.1  | 0.2  |
| k = 21  | 96.3     | 95.0 | 96.0 | 95.1      | 95.0 | 95.3 | 95.0    | 95.2 | 94.9 |
| k = 51  | 94.9     | 94.5 | N/A  | 94.7      | 95.3 | N/A  | 94.7    | 95.0 | N/A  |
| k = 100 | 95.2     | N/A  | N/A  | 95.2      | N/A  | N/A  | 94.5    | N/A  | N/A  |

Table S2: The percentage of experiments that resulted in the true mutation rate falling within the 95% confidence interval given in Theorem 8 when using various mutation rates across multiple  $k$ -mer sizes and  $L$  values. A scale factor of 0.05 was used. The results show an average over 10,000 simulations for each setting. N/A entries indicate that the parameters are not particularly meaningful and will not produce interpretable results, either because  $E[N_{\text{mut}}] \approx L$  in these cases (almost all  $k$ -mers are mutated), or because the scale factor is too small to differentiate between the two FracMinHash sketches.

| $L = 10$ K  |        |        | $L = 100$ K |         |         | $L = 1$ M |          |          |         |
|-------------|--------|--------|-------------|---------|---------|-----------|----------|----------|---------|
| $p = 0.001$ | 0.1    | 0.2    | 0.001       | 0.1     | 0.2     | 0.001     | 0.1      | 0.2      |         |
| $k = 21$    | 9792.1 | 1094.2 | 92.2        | 97920.9 | 10941.9 | 922.3     | 979208.7 | 109419.0 | 9223.3  |
| $k = 51$    | 9502.5 | 46.4   | 0.11        | 95025.4 | 463.8   | 1.1       | 950254.4 | 4638.4   | 11.4    |
| $k = 100$   | 9047.9 | 0.26   | 2.04E-6     | 90479.2 | 2.7     | 2.04E-5   | 904792.1 | 26.6     | 2.04E-4 |

Table S3: The expected number of non-mutated  $k$ -mers after undergoing the simple mutation process, shown across multiple  $k$ -mer sizes,  $L$  values, and mutation rates.

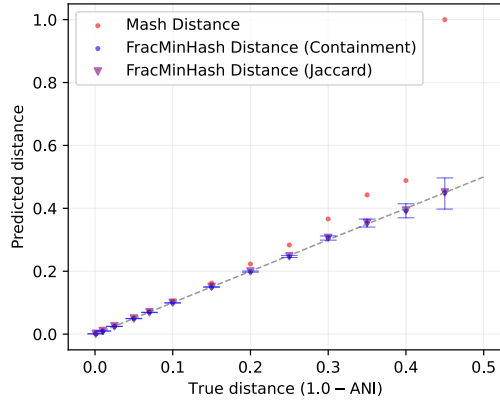

(a) Estimates of evolutionary distances between original and mutated *Staphylococcus* genome

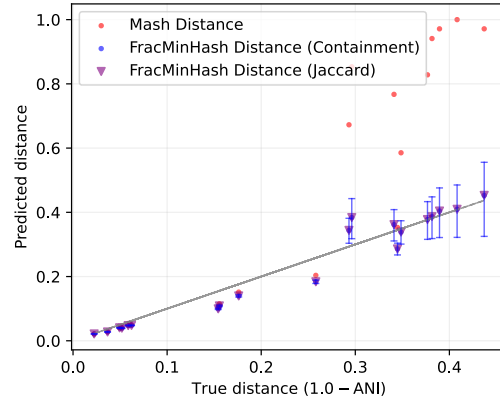

(b) Estimates of evolutionary distances between pairs of real bacterial genomes

Fig. S1: Mash distances and FracMinHash estimates of evolutionary distance (given in terms of one minus the average nucleotide identity: ANI) when (a) introducing point mutations to a *Staphylococcus* genome at a known rate, and (b) between pairs of real bacterial genomes.
