# Supplementary figures and images for: Deriving confidence intervals for mutation rates across a wide range of evolutionary distances using FracMinHash
Source: HighWire-hosted journal article supplement (doi:10.1101/gr.277651.123), 2023-06-21

Expected containment  
across  $k$ -mer sizes and mutation rates

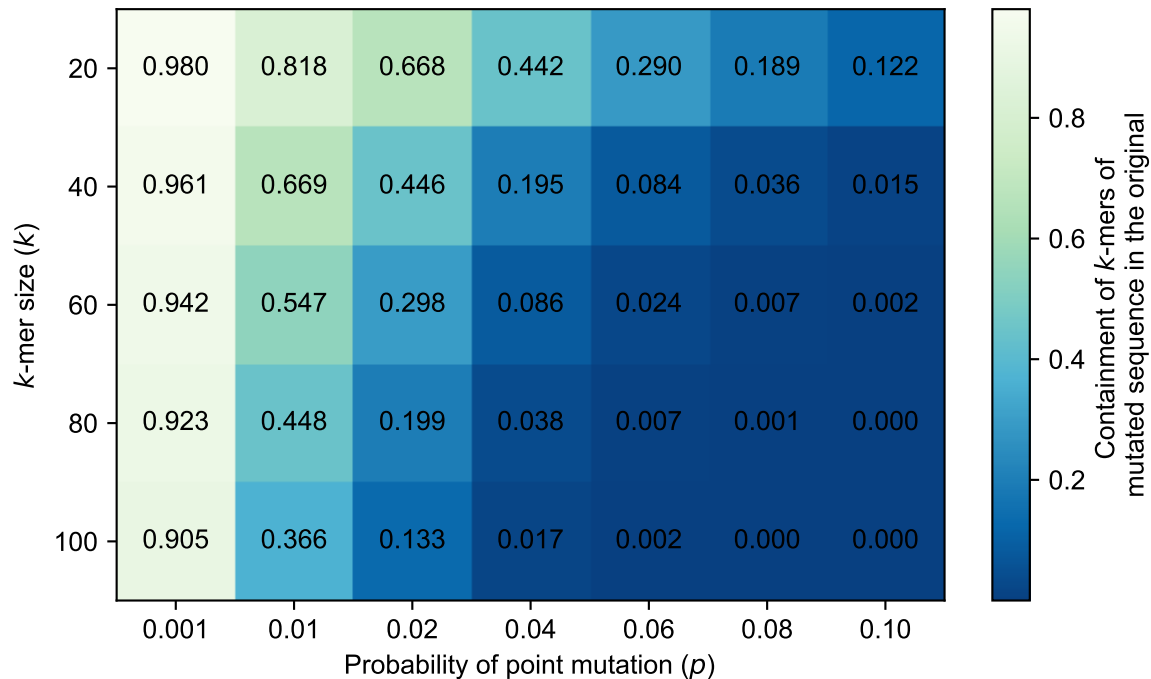

Supplement: SUPP_reproducibility_code.zip [file containment_vs_k_p_heatmap.pdf › FracMinHash-reproducibles-main/Fig-1/containment_vs_k_p_heatmap.pdf]

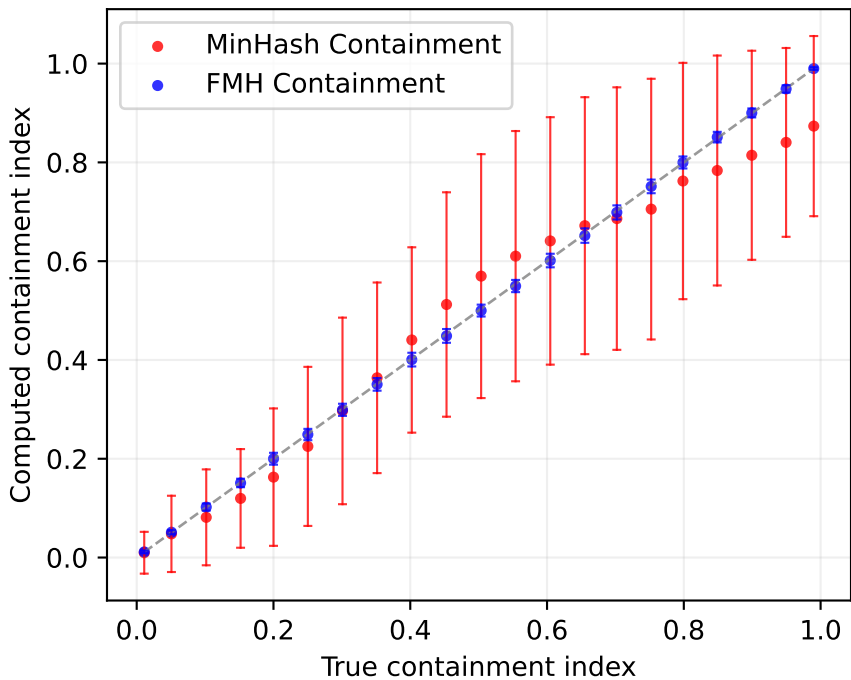

Supplement: SUPP_reproducibility_code.zip [file compare-containment-all.pdf › FracMinHash-reproducibles-main/Fig-2/plotting/compare-containment-all.pdf]

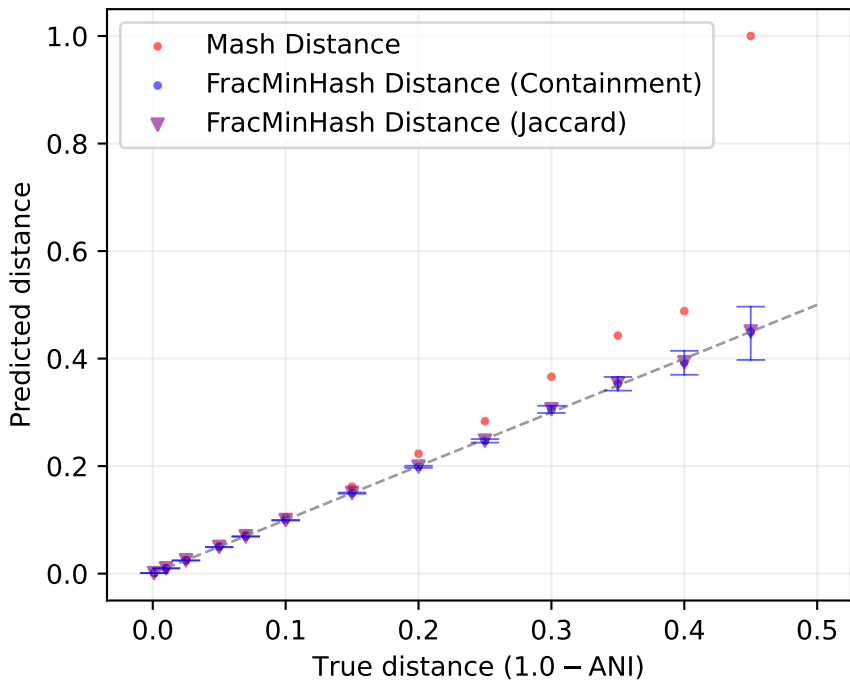

Supplement: SUPP_reproducibility_code.zip [file compare-ani-staphylococcus-j.pdf › FracMinHash-reproducibles-main/Fig-3a-S1a/plotting/compare-ani-staphylococcus-j.pdf]

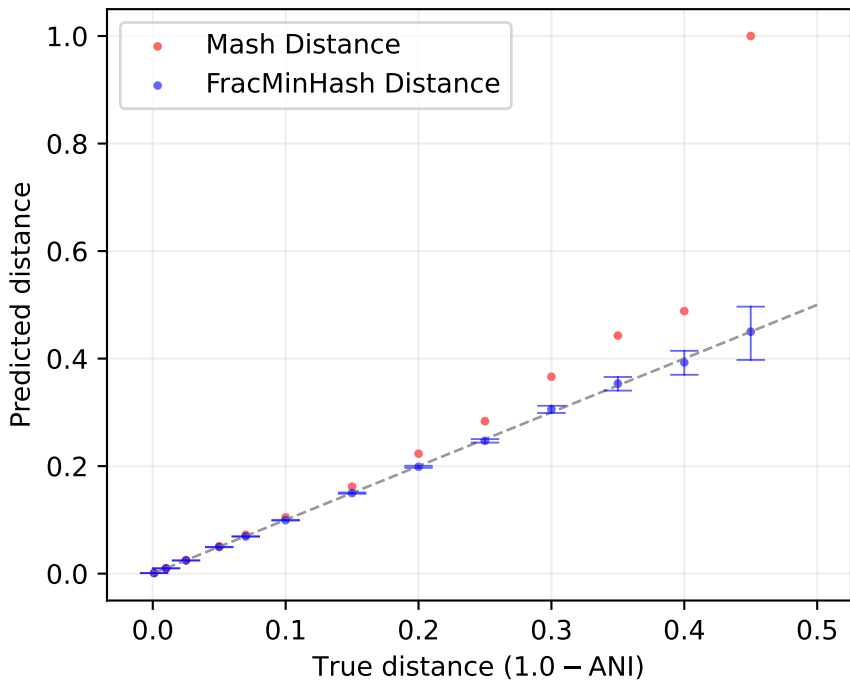

Supplement: SUPP_reproducibility_code.zip [file compare-ani-staphylococcus.pdf › FracMinHash-reproducibles-main/Fig-3a-S1a/plotting/compare-ani-staphylococcus.pdf]

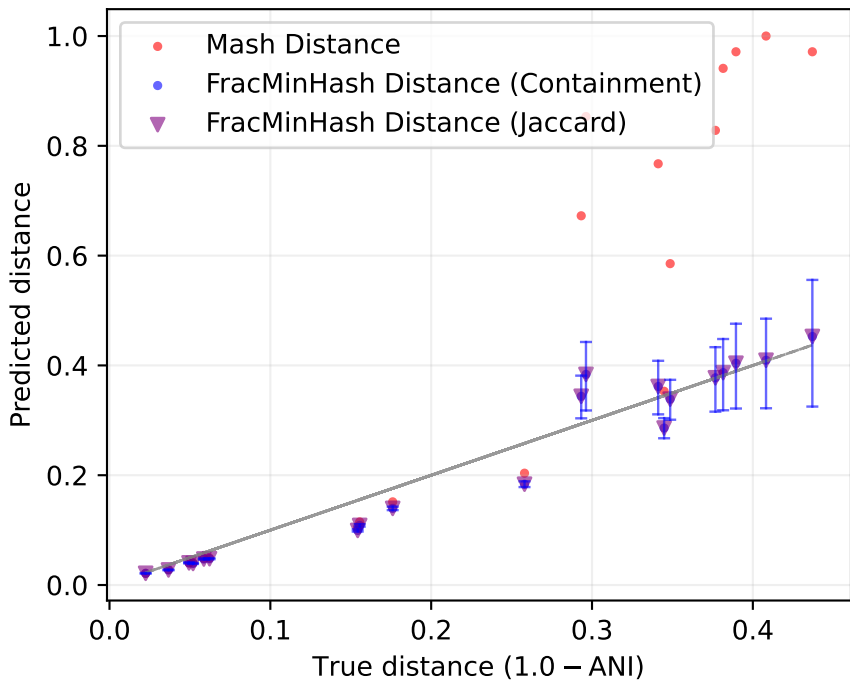

Supplement: SUPP_reproducibility_code.zip [file compare-ani-real-genomes-j.pdf › FracMinHash-reproducibles-main/Fig-3b-S1b/plotting/compare-ani-real-genomes-j.pdf]

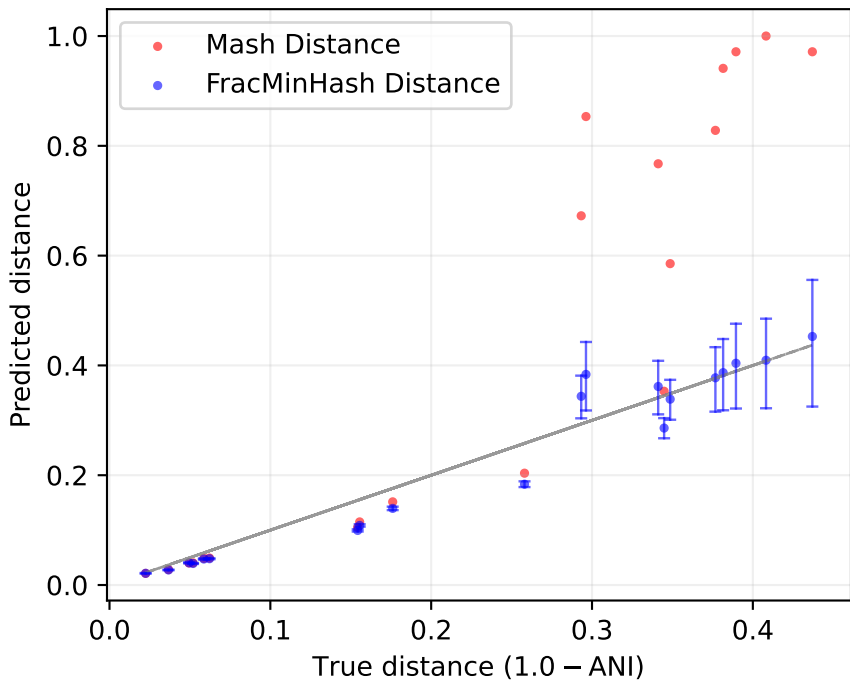

Supplement: SUPP_reproducibility_code.zip [file compare-ani-real-genomes.pdf › FracMinHash-reproducibles-main/Fig-3b-S1b/plotting/compare-ani-real-genomes.pdf]

# OrthoANI compared to different ANI tools

## FMH vs fastani

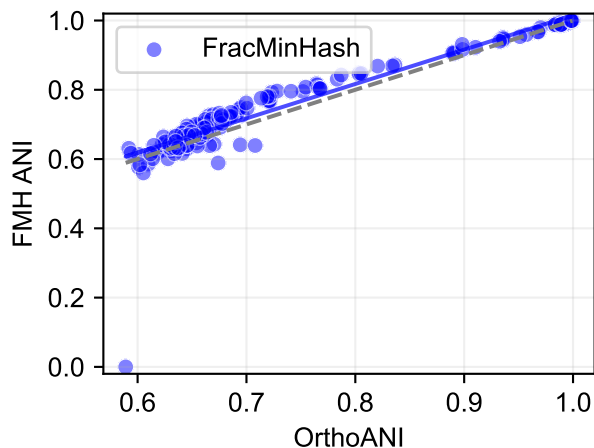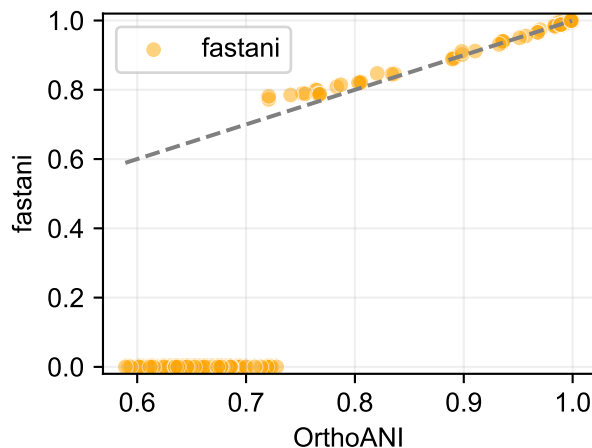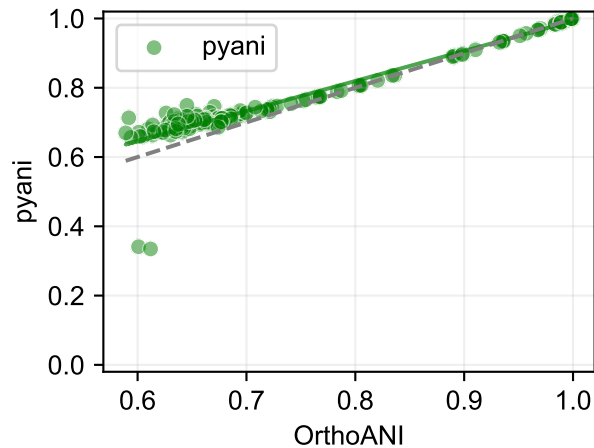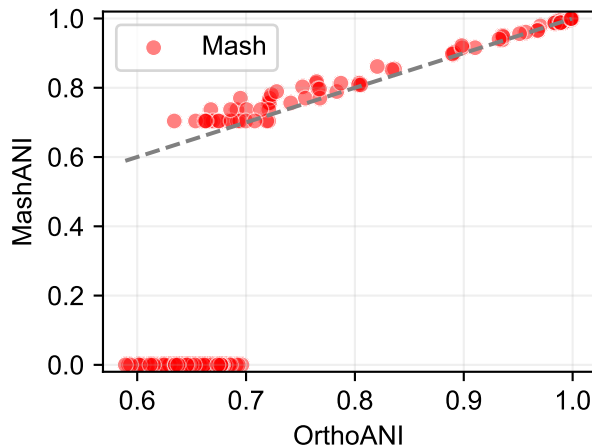

Supplement: SUPP_reproducibility_code.zip [file combined_ani.pdf › FracMinHash-reproducibles-main/Fig-4/combined_ani.pdf]
